# Supplementary material for: Contrasting changes of snow cover between different regions of the Tibetan Plateau during the latest 21 years
Source: Frontiers journal article supplement (doi:10.3389/feart.2022.1075988), 2023-01-05
Supplement: Table_1.DOCX [file Table_1.DOCX]

Supplementary Material

# Supplementary Figures and Tables

## Supplementary Table

**Supplementary Table 1.** MOD10A1/MYD10A1 NDSI thresholds for snow identification in different intervals

| Elevation(m) | < 1500 | | 1500-2000 | | 2000-2500 | | 2500-3000 | | 3000-3500 | | 3500-4000 | | 4000-4500 | | > 4500 | |
| --- | --- | --- | --- | --- | --- | --- | --- | --- | --- | --- | --- | --- | --- | --- | --- | --- |
|  | MOD | MYD | MOD | MYD | MOD | MYD | MOD | MYD | MOD | MYD | MOD | MYD | MOD | MYD | MOD | MYD |
| Sep. | 0.28 | 0.21 | 0.20 | 0.14 | 0.16 | 0.12 | 0.10 | 0.10 | 0.14 | 0.10 | 0.10 | 0.10 | 0.18 | 0.16 | 0.37 | 0.14 |
| Oct. | 0.28 | 0.21 | 0.20 | 0.14 | 0.21 | 0.13 | 0.10 | 0.13 | 0.10 | 0.31 | 0.10 | 0.33 | 0.22 | 0.10 | 0.18 | 0.26 |
| Nov. | 0.28 | 0.21 | 0.20 | 0.14 | 0.17 | 0.10 | 0.12 | 0.14 | 0.12 | 0.10 | 0.16 | 0.12 | 0.15 | 0.27 | 0.24 | 0.50 |
| Dec. | 0.35 | 0.17 | 0.23 | 0.27 | 0.25 | 0.18 | 0.16 | 0.10 | 0.16 | 0.10 | 0.10 | 0.19 | 0.13 | 0.15 | 0.18 | 0.42 |
| Jan. | 0.28 | 0.13 | 0.21 | 0.21 | 0.15 | 0.12 | 0.10 | 0.10 | 0.10 | 0.10 | 0.12 | 0.10 | 0.12 | 0.12 | 0.28 | 0.25 |
| Feb. | 0.18 | 0.11 | 0.20 | 0.11 | 0.10 | 0.10 | 0.10 | 0.14 | 0.10 | 0.10 | 0.10 | 0.10 | 0.12 | 0.27 | 0.23 | 0.31 |
| Mar. | 0.28 | 0.21 | 0.20 | 0.10 | 0.16 | 0.10 | 0.11 | 0.10 | 0.11 | 0.12 | 0.10 | 0.11 | 0.14 | 0.10 | 0.12 | 0.18 |
| Apr. | 0.28 | 0.21 | 0.20 | 0.14 | 0.10 | 0.11 | 0.10 | 0.13 | 0.10 | 0.10 | 0.10 | 0.10 | 0.11 | 0.16 | 0.27 | 0.23 |
| May | 0.28 | 0.21 | 0.20 | 0.14 | 0.16 | 0.12 | 0.13 | 0.16 | 0.13 | 0.30 | 0.13 | 0.11 | 0.10 | 0.11 | 0.11 | 0.14 |
| Jun. | 0.28 | 0.21 | 0.20 | 0.14 | 0.16 | 0.12 | 0.10 | 0.10 | 0.14 | 0.10 | 0.10 | 0.10 | 0.13 | 0.26 | 0.48 | 0.24 |
| Jul. | 0.28 | 0.21 | 0.20 | 0.14 | 0.16 | 0.12 | 0.10 | 0.10 | 0.14 | 0.10 | 0.10 | 0.10 | 0.13 | 0.14 | 0.17 | 0.28 |
| Aug. | 0.28 | 0.21 | 0.20 | 0.14 | 0.16 | 0.12 | 0.10 | 0.10 | 0.14 | 0.10 | 0.10 | 0.10 | 0.13 | 0.14 | 0.17 | 0.28 |

## Supplementary Figures


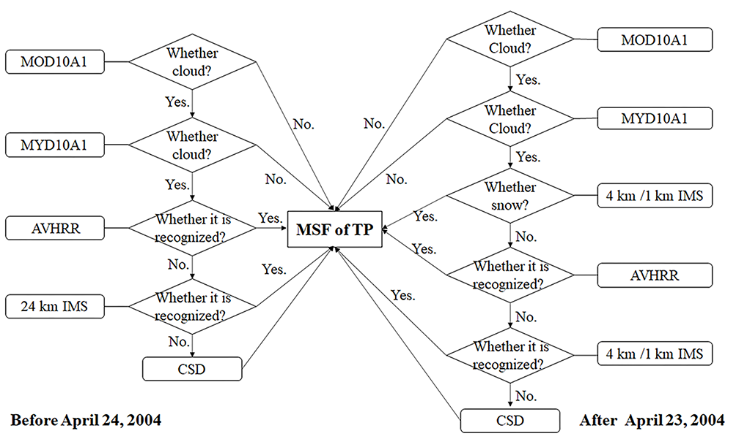


**Supplementary Figure 1.** Multi-source data fusion algorithm

**
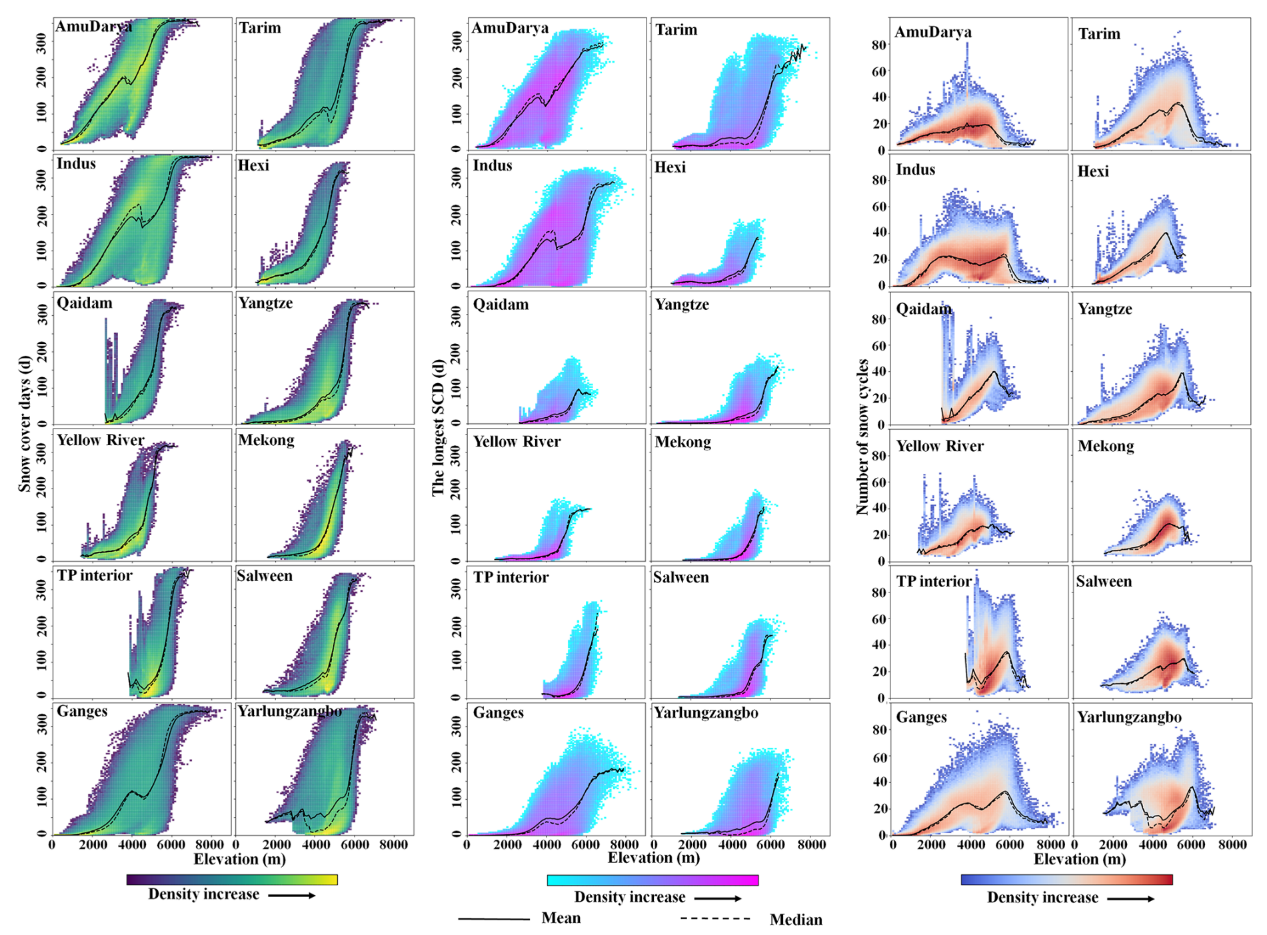
Supplementary Figure 2.** Distribution of Snow cover days, the longest SCD, and number of snow cycles in each basin of the Tibetan Plateau

**
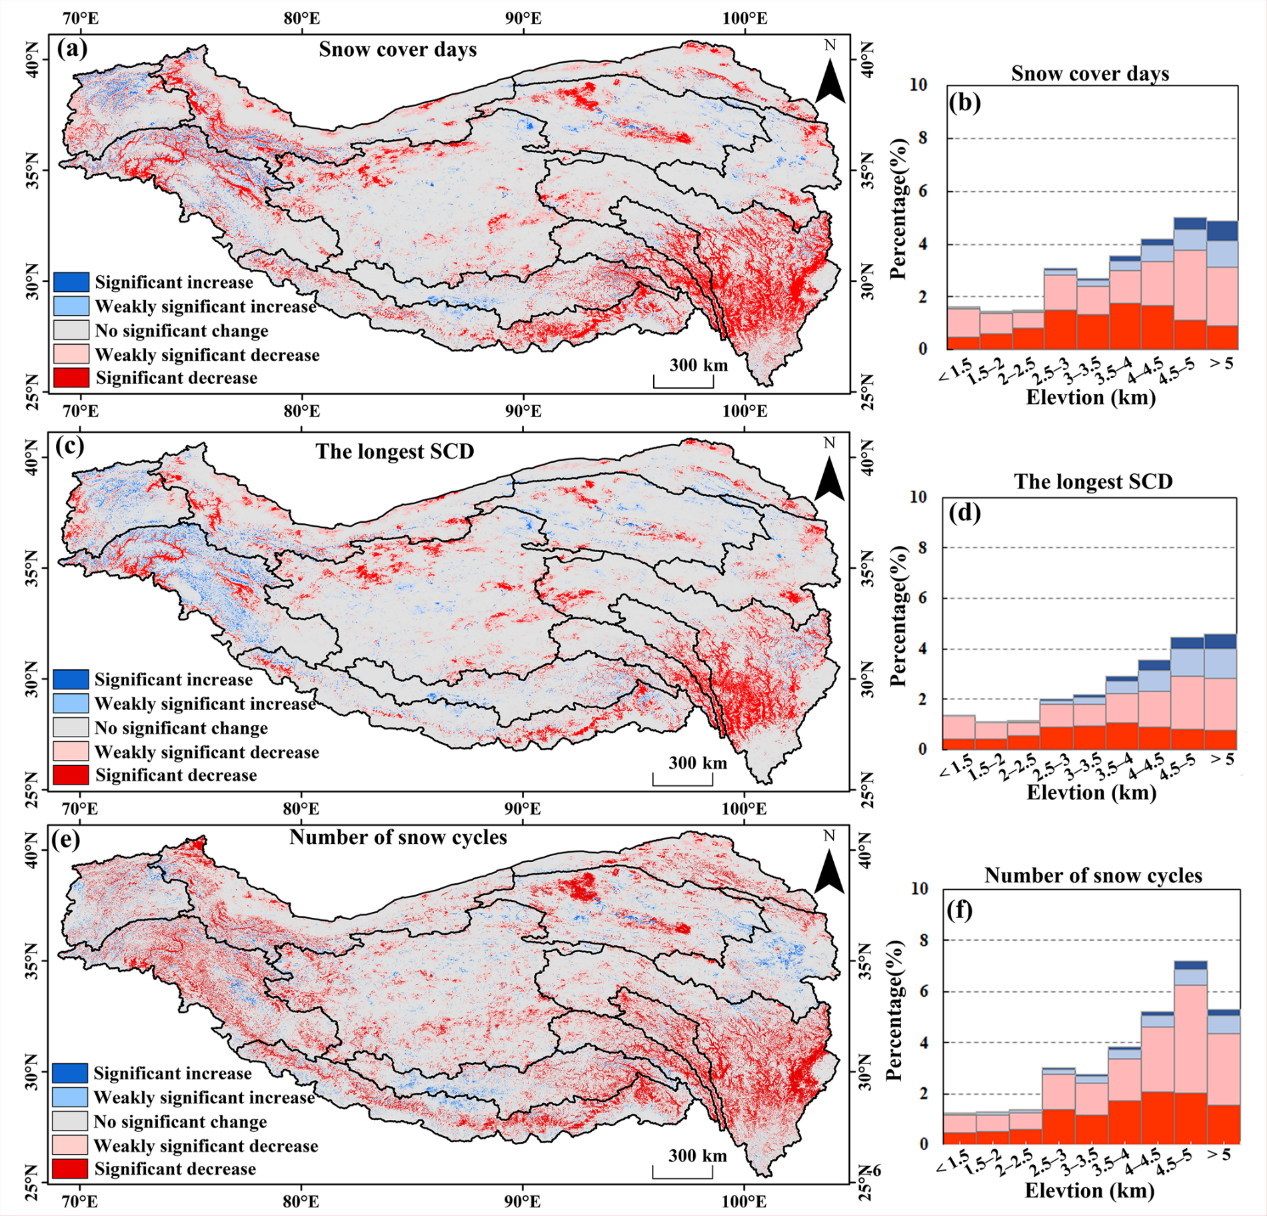
**

**Supplementary Figure 3.** The significant increase or decrease of snow cover days (a), the longest SCD (c), the number of snow cycles (e) and their percentage in the Tibetan Plateau (b, d, f)
